# Supplementary material
Source: PubMed Central journal article supplement (PMC4913485)
Supplement: Supp_Table1.pdf [file Supp_Table1.pdf]

SUPPLEMENTARY TABLE S1. SALIENT FEATURES OF POLYMERASE CHAIN REACTION PRIMER PAIRS USED IN THIS STUDY

| Target                                       | Primer: sequence (5'–3')                                                          | Product (bp) | Reference |
|----------------------------------------------|-----------------------------------------------------------------------------------|--------------|-----------|
| <i>bla</i> <sub>CTX-M</sub> gp1 <sup>a</sup> | CTX-M Gp1.F: GGAATCTGACGCTGGGTA<br>CTX-M Gp1.R: GGTTGAGGCTGGGTGAAGTA              | 232          | 16        |
| <i>bla</i> <sub>CTX-M</sub> gp1 <sup>a</sup> | CTX-M-F: TTCGTCTCTCCAGAATAAGG <sup>b</sup><br>CTX-M-R: CAGCACTTTTGCCGTCTAAG       | 968          | 43        |
| <i>bla</i> <sub>CTX-M</sub> gp2              | MultiCTXMGp2_for: CGTTAACGGCACGATGAC<br>MultiCTXMGp1-2_rev: CGATATCGTTGGTGGTRCCAT | 404          | 13        |
| <i>bla</i> <sub>CTX-M</sub> gp9              | MultiCTXMGp9_for: TCAAGCCTGCCGATCTGGT<br>MultiCTXMGp9_rev: TGATTCTCGCCGCTGAAG     | 561          | 13        |
| <i>bla</i> <sub>CTX-M</sub> gp8/25           | CTX-Mg8/25_for: AACRCRCAGACGCTCTAC<br>CTX-Mg8/25_rev: TCGAGCCGGAASGTGYAT          | 326          | 13        |
| 16S rDNA                                     | Bac331F: TCCTACGGGAGGCAGCAGT<br>Bac797R: GGACTACCAGGGTATCTAATCCTGTT               | 466          | 37        |
| Vector MCS                                   | M13F: GTTTTCCCAGTCACGAC<br>M13R: CAGGAAACAGCTATGAC                                | Variable     | Promega   |

<sup>a</sup>*bla*<sub>CTX-M</sub> gp1 primers from Ellem *et al.*<sup>16</sup> were used for quantitative PCR, while *bla*<sub>CTX-M</sub> gp1 primers from Pfeifer *et al.*<sup>43</sup> were used for conventional PCR and cloning.

<sup>b</sup>The originally published CTX-M-F primer in Pfeifer *et al.*<sup>43</sup> had an unintended G at the 5' end (Yvonne Pfeifer, personal communication), which was removed here.

Promega, Corp. 2014. pGEM-T and pGEM-T Easy Vector Systems Technical Manual. PCR, polymerase chain reaction.
