# Supplementary material
Source: PubMed Central journal article supplement (PMC4913485)
Supplement: Supp_Table2.pdf [file Supp_Table2.pdf]

SUPPLEMENTARY TABLE S2. DESCRIPTIVE SUMMARY OF 179 UNIQUE CLONED *BLA*<sub>CTX-M</sub> GROUP 1 GENES FROM COASTAL WETLANDS AND WASTEWATER

| Reference <sup>a</sup> | Site     | Cloned seq. (acc. no.) <sup>b</sup> | Amino acid substitutions <sup>c</sup> | Nucleotide mismatches <sup>d</sup> | Freq. <sup>e</sup> |
|------------------------|----------|-------------------------------------|---------------------------------------|------------------------------------|--------------------|
| CTX-M-1                | PL WWTP  | PLE-2.65 (KJ802548)                 | T171A                                 | 1                                  | 1                  |
| CTX-M-1                | PL WWTP  | PLE-2.77 (KJ802558)                 | T171A, L289W                          | 2                                  | 1                  |
| CTX-M-3                | TRE      | TRE-1.01 (KJ802643)                 | 0                                     | 6                                  |                    |
| CTX-M-3                | TRE      | TRE-1.02 (KJ802644)                 | 2                                     | 4                                  |                    |
| CTX-M-3                | TRE      | TRE-1.81 (KJ802717)                 | 6                                     | 1                                  |                    |
| CTX-M-3                | TRE      | TRE-1.61 (KJ802697)                 | 2                                     | 1                                  |                    |
| CTX-M-3                | TRE      | TRE-1.75 (KJ802711)                 | 1                                     | 1                                  |                    |
| CTX-M-3                | TRE      | TRE-1.13 (KJ802654)                 | 1                                     | 1                                  |                    |
| CTX-M-3                | TRE      | TRE-1.31 (KJ802670)                 | 1                                     | 1                                  |                    |
| CTX-M-3                | TRE      | TRE-1.35 (KJ802674)                 | 1                                     | 1                                  |                    |
| CTX-M-3                | TRE      | TRE-1.36 (KJ802675)                 | V-1A                                  | 4                                  | 1                  |
| CTX-M-3                | TRE      | TRE-1.47 (KJ802684)                 | T7P                                   | 1                                  | 4                  |
| CTX-M-3                | TRE      | TRE-1.44 (KJ802681)                 | T15A                                  | 1                                  | 1                  |
| CTX-M-3                | TRE      | TRE-1.66 (KJ802702)                 | L169S                                 | 1                                  | 1                  |
| CTX-M-3                | TRE      | TRE-1.62 (KJ802698)                 | T209A                                 | 1                                  | 2                  |
| CTX-M-3                | TRE      | TRE-1.60 (KJ802696)                 | Q222R                                 | 2                                  | 1                  |
| CTX-M-3                | TRE      | TRE-1.15 (KJ802656)                 | G288S                                 | 1                                  | 1                  |
| CTX-M-3                | TRE      | TRE-1.14 (KJ802655)                 | S228A, G236D                          | 3                                  | 1                  |
| CTX-M-3                | TRE      | TRE-1.25 (KJ802666)                 | T13A, R275L                           | 6                                  | 1                  |
| CTX-M-3                | TRE      | TRE-1.54 (KJ802691)                 | T13A, R275L                           | 6                                  | 1                  |
| CTX-M-3                | TRE      | TRE-1.63 (KJ802699)                 | T13A, R275V, D287H                    | 6                                  | 1                  |
| CTX-M-3                | TRE      | TRE-1.64 (KJ802700)                 | T13A, I139V, R275L                    | 6                                  | 1                  |
| CTX-M-3                | TRE      | TRE-1.72 (KJ802708)                 | T13A, A134V, R275L                    | 6                                  | 1                  |
| CTX-M-3                | SBI WWTP | SBI-3.02 (KJ802560)                 | 0                                     | 25                                 |                    |
| CTX-M-3                | SBI WWTP | SBI-3.18 (KJ802576)                 | 2                                     | 3                                  |                    |
| CTX-M-3                | SBI WWTP | SBI-3.31 (KJ802589)                 | 1                                     | 1                                  |                    |
| CTX-M-3                | SBI WWTP | SBI-3.32 (KJ802590)                 | 3                                     | 1                                  |                    |
| CTX-M-3                | SBI WWTP | SBI-3.26 (KJ802584)                 | 1                                     | 1                                  |                    |
| CTX-M-3                | SBI WWTP | SBI-3.46 (KJ802603)                 | 1                                     | 1                                  |                    |
| CTX-M-3                | SBI WWTP | SBI-3.48 (KJ802605)                 | 1                                     | 1                                  |                    |
| CTX-M-3                | SBI WWTP | SBI-3.08 (KJ802566)                 | 5                                     | 1                                  |                    |
| CTX-M-3                | SBI WWTP | SBI-3.67 (KJ802624)                 | 1                                     | 1                                  |                    |
| CTX-M-3                | SBI WWTP | SBI-3.70 (KJ802627)                 | 1                                     | 1                                  |                    |
| CTX-M-3                | SBI WWTP | SBI-3.83 (KJ802640)                 | 1                                     | 1                                  |                    |
| CTX-M-3                | SBI WWTP | SBI-3.73 (KJ802630)                 | 1                                     | 1                                  |                    |
| CTX-M-3                | SBI WWTP | SBI-3.85 (KJ802642)                 | 1                                     | 1                                  |                    |
| CTX-M-3                | SBI WWTP | SBI-3.25 (KJ802583)                 | Q5K                                   | 2                                  | 1                  |
| CTX-M-3                | SBI WWTP | SBI-3.56 (KJ802613)                 | M9V                                   | 2                                  | 1                  |
| CTX-M-3                | SBI WWTP | SBI-3.07 (KJ802565)                 | T13A                                  | 4                                  | 1                  |
| CTX-M-3                | SBI WWTP | SBI-3.50 (KJ802607)                 | T13A                                  | 6                                  | 1                  |
| CTX-M-3                | SBI WWTP | SBI-3.24 (KJ802582)                 | T13A                                  | 6                                  | 1                  |
| CTX-M-3                | SBI WWTP | SBI-3.28 (KJ802586)                 | K33R                                  | 1                                  | 1                  |
| CTX-M-3                | SBI WWTP | SBI-3.23 (KJ802581)                 | D54G                                  | 2                                  | 1                  |
| CTX-M-3                | SBI WWTP | SBI-3.39 (KJ802596)                 | K99E                                  | 4                                  | 1                  |
| CTX-M-3                | SBI WWTP | SBI-3.74 (KJ802631)                 | K111R                                 | 1                                  | 1                  |
| CTX-M-3                | SBI WWTP | SBI-3.13 (KJ802571)                 | N114S                                 | 3                                  | 1                  |
| CTX-M-3                | SBI WWTP | SBI-3.35 (KJ802593)                 | T116A                                 | 1                                  | 1                  |
| CTX-M-3                | SBI WWTP | SBI-3.29 (KJ802587)                 | S130G                                 | 1                                  | 1                  |
| CTX-M-3                | SBI WWTP | SBI-3.84 (KJ802641)                 | T181A                                 | 1                                  | 1                  |
| CTX-M-3                | SBI WWTP | SBI-3.05 (KJ802563)                 | A185T1                                | 1                                  |                    |
| CTX-M-3                | SBI WWTP | SBI-3.55 (KJ802612)                 | D233G                                 | 2                                  | 1                  |
| CTX-M-3                | SBI WWTP | SBI-3.15 (KJ802573)                 | E272K                                 | 2                                  | 1                  |
| CTX-M-3                | SBI WWTP | SBI-3.12 (KJ802570)                 | Q5K, V21A                             | 2                                  | 1                  |
| CTX-M-3                | SBI WWTP | SBI-3.01 (KJ802559)                 | D29G, Q32R                            | 2                                  | 1                  |
| CTX-M-3                | SBI WWTP | SBI-3.14 (KJ802572)                 | H112R, V277I                          | 5                                  | 2                  |
| CTX-M-3                | SBI WWTP | SBI-3.04 (KJ802562)                 | N114D, R255C                          | 4                                  | 1                  |
| CTX-M-3                | SBI WWTP | SBI-3.27 (KJ802585)                 | N114D, T116A                          | 6                                  | 1                  |
| CTX-M-3                | SBI WWTP | SBI-3.37 (KJ802595)                 | M135V, M186V                          | 2                                  | 1                  |
| CTX-M-3                | SBI WWTP | SBI-3.58 (KJ802615)                 | E64G, Q128R, D179G                    | 3                                  | 1                  |
| CTX-M-3                | SBI WWTP | SBI-3.42 (KJ802599)                 | T13A, E110V, R274C R275L              | 7                                  | 1                  |
| CTX-M-3                | PL WWTP  | PLE-2.16 (KJ802499)                 | 0                                     | 5                                  |                    |
| CTX-M-3                | PL WWTP  | PLE-2.31 (KJ802514)                 | 6                                     | 2                                  |                    |

(continued)

SUPPLEMENTARY TABLE S2. (CONTINUED)

| Reference <sup>a</sup> | Site     | Cloned seq. (acc. no.) <sup>b</sup> | Amino acid substitutions <sup>c</sup> | Nucleotide mismatches <sup>d</sup> | Freq. <sup>e</sup> |
|------------------------|----------|-------------------------------------|---------------------------------------|------------------------------------|--------------------|
| CTX-M-3                | PL WWTP  | PLE-2.05 (KJ802489)                 | 1                                     | 1                                  |                    |
| CTX-M-3                | PL WWTP  | PLE-2.07 (KJ802491)                 | 1                                     | 1                                  |                    |
| CTX-M-3                | PL WWTP  | PLE-2.17 (KJ802500)                 | 4                                     | 1                                  |                    |
| CTX-M-3                | PL WWTP  | PLE-2.29 (KJ802512)                 | 1                                     | 1                                  |                    |
| CTX-M-3                | PL WWTP  | PLE-2.47 (KJ802530)                 | 1                                     | 1                                  |                    |
| CTX-M-3                | PL WWTP  | PLE-2.54 (KJ802537)                 | 1                                     | 1                                  |                    |
| CTX-M-3                | PL WWTP  | PLE-2.55 (KJ802538)                 | 4                                     | 1                                  |                    |
| CTX-M-3                | PL WWTP  | PLE-2.64 (KJ802547)                 | 2                                     | 1                                  |                    |
| CTX-M-3                | PL WWTP  | PLE-2.11 (KJ802495)                 | R4P                                   | 5                                  | 1                  |
| CTX-M-3                | PL WWTP  | PLE-2.18 (KJ802501)                 | T13A                                  | 5                                  | 3                  |
| CTX-M-3                | PL WWTP  | PLE-2.43 (KJ802526)                 | T13A                                  | 6                                  | 1                  |
| CTX-M-3                | PL WWTP  | PLE-2.08 (KJ802492)                 | I58V                                  | 4                                  | 1                  |
| CTX-M-3                | PL WWTP  | PLE-2.42 (KJ802525)                 | A62V                                  | 1                                  | 1                  |
| CTX-M-3                | PL WWTP  | PLE-2.38 (KJ802521)                 | D63N                                  | 5                                  | 1                  |
| CTX-M-3                | PL WWTP  | PLE-2.49 (KJ802532)                 | M68T                                  | 1                                  | 1                  |
| CTX-M-3                | PL WWTP  | PLE-2.45 (KJ802528)                 | A77V                                  | 1                                  | 1                  |
| CTX-M-3                | PL WWTP  | PLE-2.32 (KJ802515)                 | Y129H                                 | 7                                  | 1                  |
| CTX-M-3                | PL WWTP  | PLE-2.14 (KJ802498)                 | V142I                                 | 4                                  | 1                  |
| CTX-M-3                | PL WWTP  | PLE-2.53 (KJ802536)                 | W251R                                 | 4                                  | 1                  |
| CTX-M-3                | PL WWTP  | PLE-2.09 (KJ802493)                 | V277I                                 | 1                                  | 1                  |
| CTX-M-3                | PL WWTP  | PLE-2.34 (KJ802517)                 | V277I2                                | 1                                  |                    |
| CTX-M-3                | PL WWTP  | PLE-2.28 (KJ802511)                 | V285A                                 | 4                                  | 1                  |
| CTX-M-3                | PL WWTP  | PLE-2.26 (KJ802509)                 | L289W                                 | 4                                  | 1                  |
| CTX-M-12               | TRE      | TRE-1.42 (KJ802680)                 | S89N                                  | 1                                  | 1                  |
| CTX-M-12               | TRE      | TRE-1.57 (KJ802693)                 | T286P                                 | 1                                  | 1                  |
| CTX-M-12               | TRE      | TRE-1.28 (KJ802667)                 | Q5K, A13T, S89N I277V                 | 5                                  | 1                  |
| CTX-M-12               | TRE      | TRE-1.17 (KJ802658)                 | T7M, A13T, S89N I277V                 | 5                                  | 1                  |
| CTX-M-12               | SBI WWTP | SBI-3.09 (KJ802567)                 | 0                                     | 1                                  |                    |
| CTX-M-12               | SBI WWTP | SBI-3.06 (KJ802564)                 | S89N                                  | 4                                  | 1                  |
| CTX-M-12               | SBI WWTP | SBI-3.52 (KJ802609)                 | S89N, I277V                           | 3                                  | 1                  |
| CTX-M-12               | SBI WWTP | SBI-3.61 (KJ802618)                 | A13T, S89N, I277V                     | 4                                  | 2                  |
| CTX-M-12               | PL WWTP  | PLE-2.56 (KJ802539)                 | 1                                     | 1                                  |                    |
| CTX-M-12               | PL WWTP  | PLE-2.70 (KJ802551)                 | 0                                     | 1                                  |                    |
| CTX-M-12               | PL WWTP  | PLE-2.19 (KJ802502)                 | I277V                                 | 3                                  | 1                  |
| CTX-M-12               | PL WWTP  | PLE-2.20 (KJ802503)                 | S89N, I277V 3                         | 1                                  |                    |
| CTX-M-12               | PL WWTP  | PLE-2.73 (KJ802554)                 | S89N, S147G, F151L                    | 5                                  | 1                  |
| CTX-M-15               | PL WWTP  | PLE-2.44 (KJ802527)                 | 1                                     | 1                                  |                    |
| CTX-M-15               | PL WWTP  | PLE-2.46 (KJ802529)                 | 1                                     | 1                                  |                    |
| CTX-M-15               | PL WWTP  | PLE-2.13 (KJ802497)                 | 1                                     | 1                                  |                    |
| CTX-M-15               | PL WWTP  | PLE-2.76 (KJ802557)                 | 2                                     | 1                                  |                    |
| CTX-M-15               | PL WWTP  | PLE-2.02 (KJ802487)                 | V-1M                                  | 3                                  | 1                  |
| CTX-M-15               | PL WWTP  | PLE-2.61 (KJ802544)                 | A77V                                  | 2                                  | 1                  |
| CTX-M-15               | PL WWTP  | PLE-2.39 (KJ802522)                 | F160L                                 | 2                                  | 2                  |
| CTX-M-15               | PL WWTP  | PLE-2.69 (KJ802550)                 | P257L                                 | 2                                  | 1                  |
| CTX-M-15               | PL WWTP  | PLE-2.33 (KJ802516)                 | Q26H, Q206R                           | 2                                  | 1                  |
| CTX-M-15               | PL WWTP  | PLE-2.52 (KJ802535)                 | Q5K, R178H, V249A                     | 5                                  | 1                  |
| CTX-M-22               | TRE      | TRE-1.20 (KJ802661)                 | 0                                     | 1                                  |                    |
| CTX-M-22               | SBI WWTP | SBI-3.43 (KJ802600)                 | 0                                     | 1                                  |                    |
| CTX-M-22               | PL WWTP  | PLE-2.60 (KJ802543)                 | K98E                                  | 1                                  | 1                  |
| CTX-M-29               | SBI WWTP | SBI-3.19 (KJ802577)                 | G240D, N287D                          | 2                                  | 1                  |
| CTX-M-29               | PL WWTP  | PLE-2.51 (KJ802534)                 | N287D                                 | 1                                  | 1                  |
| CTX-M-29               | PL WWTP  | PLE-2.10 (KJ802494)                 | G240D, N287D                          | 3                                  | 1                  |
| CTX-M-29               | PL WWTP  | PLE-2.35 (KJ802518)                 | G240D, N287D                          | 3                                  | 1                  |
| CTX-M-29               | PL WWTP  | PLE-2.62 (KJ802545)                 | G240D, N287D                          | 2                                  | 1                  |
| CTX-M-29               | PL WWTP  | PLE-2.06 (KJ802490)                 | Y24C, G240D, N287D                    | 7                                  | 1                  |
| CTX-M-30               | TRE      | TRE-1.12 (KJ802653)                 | 2                                     | 6                                  |                    |
| CTX-M-30               | TRE      | TRE-1.16 (KJ802657)                 | 3                                     | 2                                  |                    |
| CTX-M-30               | TRE      | TRE-1.18 (KJ802659)                 | 4                                     | 1                                  |                    |
| CTX-M-30               | TRE      | TRE-1.50 (KJ802687)                 | 3                                     | 1                                  |                    |
| CTX-M-30               | TRE      | TRE-1.84 (KJ802720)                 | R4C                                   | 4                                  | 1                  |
| CTX-M-30               | TRE      | TRE-1.80 (KJ802716)                 | L16P                                  | 5                                  | 1                  |
| CTX-M-30               | TRE      | TRE-1.30 (KJ802669)                 | M68T                                  | 5                                  | 1                  |
| CTX-M-30               | TRE      | TRE-1.76 (KJ802712)                 | N104S                                 | 4                                  | 1                  |

(continued)

SUPPLEMENTARY TABLE S2. (CONTINUED)

| Reference <sup>a</sup> | Site     | Cloned seq. (acc. no.) <sup>b</sup> | Amino acid substitutions <sup>c</sup> | Nucleotide mismatches <sup>d</sup> | Freq. <sup>e</sup> |
|------------------------|----------|-------------------------------------|---------------------------------------|------------------------------------|--------------------|
| CTX-M-30               | TRE      | TRE-1.78 (KJ802714)                 | E121G                                 | 3                                  | 1                  |
| CTX-M-30               | TRE      | TRE-1.58 (KJ802694)                 | T159M                                 | 4                                  | 1                  |
| CTX-M-30               | TRE      | TRE-1.07 (KJ802648)                 | V230D                                 | 5                                  | 1                  |
| CTX-M-30               | TRE      | TRE-1.46 (KJ802683)                 | D240G                                 | 3                                  | 1                  |
| CTX-M-30               | TRE      | TRE-1.39 (KJ802677)                 | T243A                                 | 3                                  | 2                  |
| CTX-M-30               | TRE      | TRE-1.21 (KJ802662)                 | V261A                                 | 4                                  | 1                  |
| CTX-M-30               | TRE      | TRE-1.24 (KJ802665)                 | L16P, I58M                            | 4                                  | 1                  |
| CTX-M-30               | TRE      | TRE-1.05 (KJ802646)                 | S20R, P257L, K270R                    | 5                                  | 1                  |
| CTX-M-30               | TRE      | TRE-1.71 (KJ802707)                 | L81P, A205T                           | 5                                  | 1                  |
| CTX-M-30               | TRE      | TRE-1.08 (KJ802649)                 | E38G, P107L, L193P                    | 8                                  | 1                  |
| CTX-M-30               | TRE      | TRE-1.09 (KJ802650)                 | S70N, R178C, V208A S280A              | 7                                  | 1                  |
| CTX-M-30               | TRE      | TRE-1.06 (KJ802647)                 | S100P, V261I, Q268R L289S             | 7                                  | 2                  |
| CTX-M-30               | SBI WWTP | SBI-3.78 (KJ802635)                 | 4                                     | 1                                  |                    |
| CTX-M-30               | SBI WWTP | SBI-3.63 (KJ802620)                 | 2                                     | 1                                  |                    |
| CTX-M-30               | SBI WWTP | SBI-3.40 (KJ802597)                 | 3                                     | 1                                  |                    |
| CTX-M-30               | SBI WWTP | SBI-3.22 (KJ802580)                 | K111R                                 | 4                                  | 1                  |
| CTX-M-30               | SBI WWTP | SBI-3.11 (KJ802569)                 | A227T                                 | 4                                  | 1                  |
| CTX-M-30               | SBI WWTP | SBI-3.36 (KJ802594)                 | A227T                                 | 61                                 |                    |
| CTX-M-30               | SBI WWTP | SBI-3.75 (KJ802632)                 | A282T                                 | 5                                  | 1                  |
| CTX-M-30               | SBI WWTP | SBI-3.47 (KJ802604)                 | A13T, E87G                            | 5                                  | 2                  |
| CTX-M-30               | SBI WWTP | SBI-3.80 (KJ802637)                 | A13T, Y241C                           | 5                                  | 1                  |
| CTX-M-30               | PL WWTP  | PLE-2.24 (KJ802507)                 | 2                                     | 2                                  |                    |
| CTX-M-30               | PL WWTP  | PLE-2.50 (KJ802533)                 | 3                                     | 1                                  |                    |
| CTX-M-30               | PL WWTP  | PLE-2.63 (KJ802546)                 | 3                                     | 1                                  |                    |
| CTX-M-30               | PL WWTP  | PLE-2.22 (KJ802505)                 | 4                                     | 1                                  |                    |
| CTX-M-30               | PL WWTP  | PLE-2.74 (KJ802555)                 | Q5P                                   | 4                                  | 1                  |
| CTX-M-30               | PL WWTP  | PLE-2.48 (KJ802531)                 | D114N                                 | 5                                  | 1                  |
| CTX-M-30               | PL WWTP  | PLE-2.04 (KJ802488)                 | L289W                                 | 5                                  | 1                  |
| CTX-M-30               | PL WWTP  | PLE-2.71 (KJ802552)                 | A79T, L289W                           | 5                                  | 1                  |
| CTX-M-36               | TRE      | TRE-1.03 (KJ802645)                 | 2                                     | 2                                  |                    |
| CTX-M-36               | TRE      | TRE-1.83 (KJ802719)                 | 0                                     | 2                                  |                    |
| CTX-M-36               | TRE      | TRE-1.19 (KJ802660)                 | 3                                     | 1                                  |                    |
| CTX-M-36               | TRE      | TRE-1.49 (KJ802686)                 | 1                                     | 1                                  |                    |
| CTX-M-36               | TRE      | TRE-1.55 (KJ802692)                 | 2                                     | 1                                  |                    |
| CTX-M-36               | TRE      | TRE-1.73 (KJ802709)                 | 2                                     | 1                                  |                    |
| CTX-M-36               | TRE      | TRE-1.53 (KJ802690)                 | Q5R                                   | 3                                  | 1                  |
| CTX-M-36               | TRE      | TRE-1.52 (KJ802689)                 | V47M                                  | 3                                  | 1                  |
| CTX-M-36               | TRE      | TRE-1.74 (KJ802710)                 | I139V                                 | 1                                  | 1                  |
| CTX-M-36               | TRE      | TRE-1.48 (KJ802685)                 | L289S                                 | 1                                  | 1                  |
| CTX-M-36               | TRE      | TRE-1.59 (KJ802695)                 | T7P, T209I                            | 2                                  | 1                  |
| CTX-M-36               | TRE      | TRE-1.82 (KJ802718)                 | M9T, D101G                            | 2                                  | 1                  |
| CTX-M-36               | TRE      | TRE-1.69 (KJ802705)                 | M68T, S70I                            | 5                                  | 1                  |
| CTX-M-36               | TRE      | TRE-1.79 (KJ802715)                 | S70I, S280L                           | 4                                  | 1                  |
| CTX-M-36               | TRE      | TRE-1.29 (KJ802668)                 | L3R, R4V, N245S                       | 4                                  | 1                  |
| CTX-M-36               | SBI WWTP | SBI-3.16 (KJ802574)                 | N287D                                 | 2                                  | 1                  |
| CTX-M-36               | PL WWTP  | PLE-2.01 (KJ802486)                 | 2                                     | 2                                  |                    |
| CTX-M-36               | PL WWTP  | PLE-2.40 (KJ802523)                 | 0                                     | 1                                  |                    |
| CTX-M-36               | PL WWTP  | PLE-2.67 (KJ802549)                 | S140A                                 | 3                                  | 1                  |
| CTX-M-36               | PL WWTP  | PLE-2.27 (KJ802510)                 | T149I                                 | 3                                  | 1                  |
| CTX-M-61               | SBI WWTP | SBI-3.68 (KJ802625)                 | 1                                     | 1                                  |                    |
| CTX-M-62               | PL WWTP  | PLE-2.57 (KJ802540)                 | D63N, S167P                           | 7                                  | 1                  |
| CTX-M-62               | PL WWTP  | PLE-2.37 (KJ802520)                 | N89S, S167P                           | 5                                  | 1                  |
| CTX-M-62               | PL WWTP  | PLE-2.12 (KJ802496)                 | V30A, D63N, S167P V208A               | 8                                  | 1                  |
| CTX-M-66               | SBI WWTP | SBI-3.60 (KJ802617)                 | 0                                     | 1                                  |                    |

<sup>a</sup>The most similar *bla*<sub>CTX-M</sub> sequence from those in the curated collection maintained by the Lahey Clinic ([www.lahey.org/Studies/](http://www.lahey.org/Studies/)).

<sup>b</sup>The cloned sequence designation and its accession number in the GenBank/DDBJ/EMBL databases.

<sup>c</sup>Deduced amino acid substitutions relative to the most similar CTX-M reference sequence. In keeping with  $\beta$ -lactamase numbering conventions<sup>3</sup>, CTX-M amino acid numbering in this report originates with S70 and counts forward and backward from there. As a result, all amino acid numbers are offset by three relative to the *N*-terminal methionine, which is designated M-2. Additionally, as CTX-M enzymes do not have an amino acid at position 239 relative to staphylococcal penicillinases (Karen Bush, personal communication), the amino acid sequences in this report skip from position 238 to 240, making all positions after 238 offset by two amino acids relative to the *N*-terminal methionine.

<sup>d</sup>The number of nucleotide differences between the cloned sequence and the most similar *bla*<sub>CTX-M</sub> reference sequence.

<sup>e</sup>The number of times the sequence was recovered in its library.

PL WWTP, Point Loma Waste Water Treatment Plant (effluent); SBI WWTP, South Bay International Waste Water Treatment Plant (all fractions combined); TRE, Tijuana River Estuary (wet season).
